# Supplementary material
Source: Springer Nature journal article supplement (https://www.springermedizin.de/resource/supplementary/12936_2008_800_MOESM1_ESM.pdf/9548956)

|                    |                  |                                   |
|--------------------|------------------|-----------------------------------|
| Climate unsuitable | White box        | Malaria absent                    |
|                    | Yellow box       | Malaria marginal / epidemic prone |
| Climate suitable   | Red box          | Malaria endemic                   |
|                    | Thick black line | Country boundaries                |
|                    | Thin black line  | Administrative boundaries         |
|                    | Blue oval        | Perennial water bodies            |

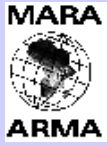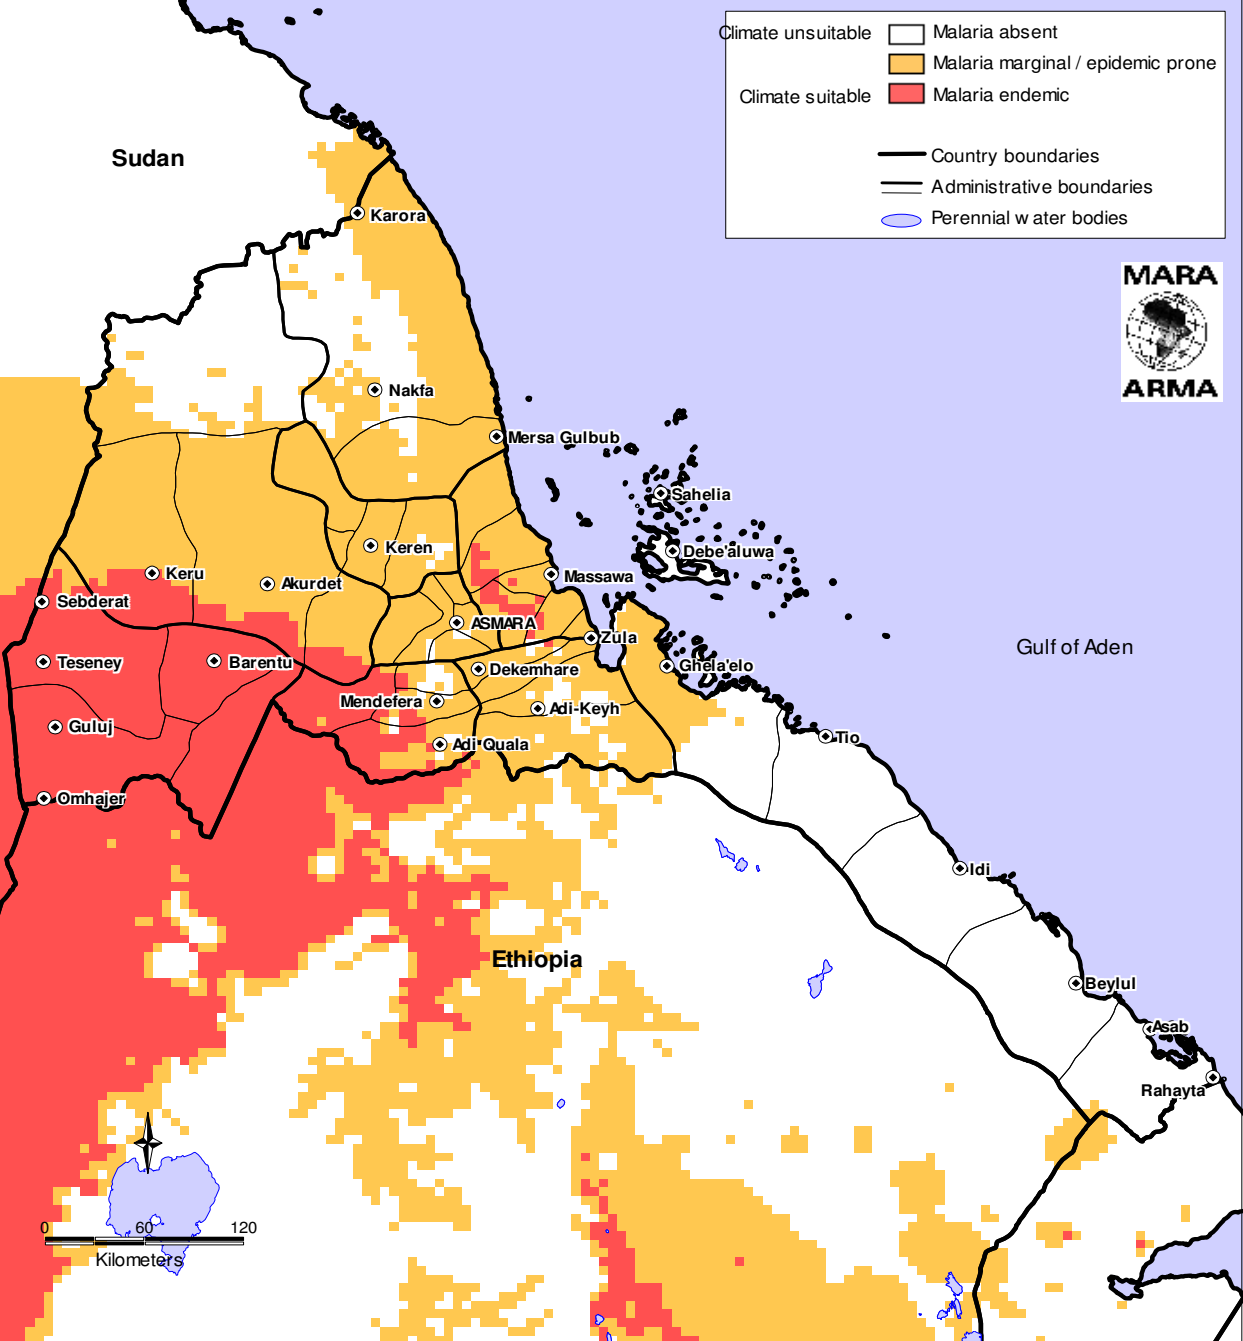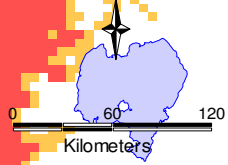

Supplement: MOESM1 [file 9548956]
